# Supplementary material
Source: PubMed Central journal article supplement (PMC3390017)
Supplement: NIHMS385147-supplement-1_si_001.pdf [file NIHMS385147-supplement-1_si_001.pdf]

**Supporting Information**

**Identification of Novel Fluorochemicals in Aqueous Film-Forming Foams (AFFF) Used by  
the US Military**

*Benjamin J. Place<sup>1</sup> and Jennifer A. Field<sup>2\*</sup>*

<sup>1</sup> Department of Chemistry, Oregon State University, Corvallis, OR

<sup>2</sup> Department of Environmental and Molecular Toxicology, Oregon State University, Corvallis,  
OR

\*Corresponding Author Information:

1007 ALS Building

Oregon State University

Corvallis, OR 97331

Email: Jennifer.Field@oregonstate.edu

Phone: 541-737-2267

## **Materials and Methods**

### *High Performance Liquid Chromatography Quadrupole-Time-of-Flight Mass Spectrometry*

Separations were performed on a Waters Acquity H-Class UPLC (Waters Corp., Milford, MA) using a Acquity BEH C18 column (2.1 mm ID x 100 mm, 1.7  $\mu$ m particle size). The mobile phase consisted of 0.5 mM ammonium acetate in water (A) and methanol (B) and the flow rate was maintained at 0.3 mL/min for the entirety of the separation. The gradient program began with a mobile phase of 20% B followed by a slope to 95% B in 10 min, held at 95% B for 5 min then a downward slope to 20% B over 0.5 min and held at 20% B for 2.5 min to re-equilibrate the column. The column was maintained at a constant temperature of 60 °C. The sample injection size was 20  $\mu$ L.

**Figure S1.** Example FAB-MS mass spectra of a 3M AFFF product.

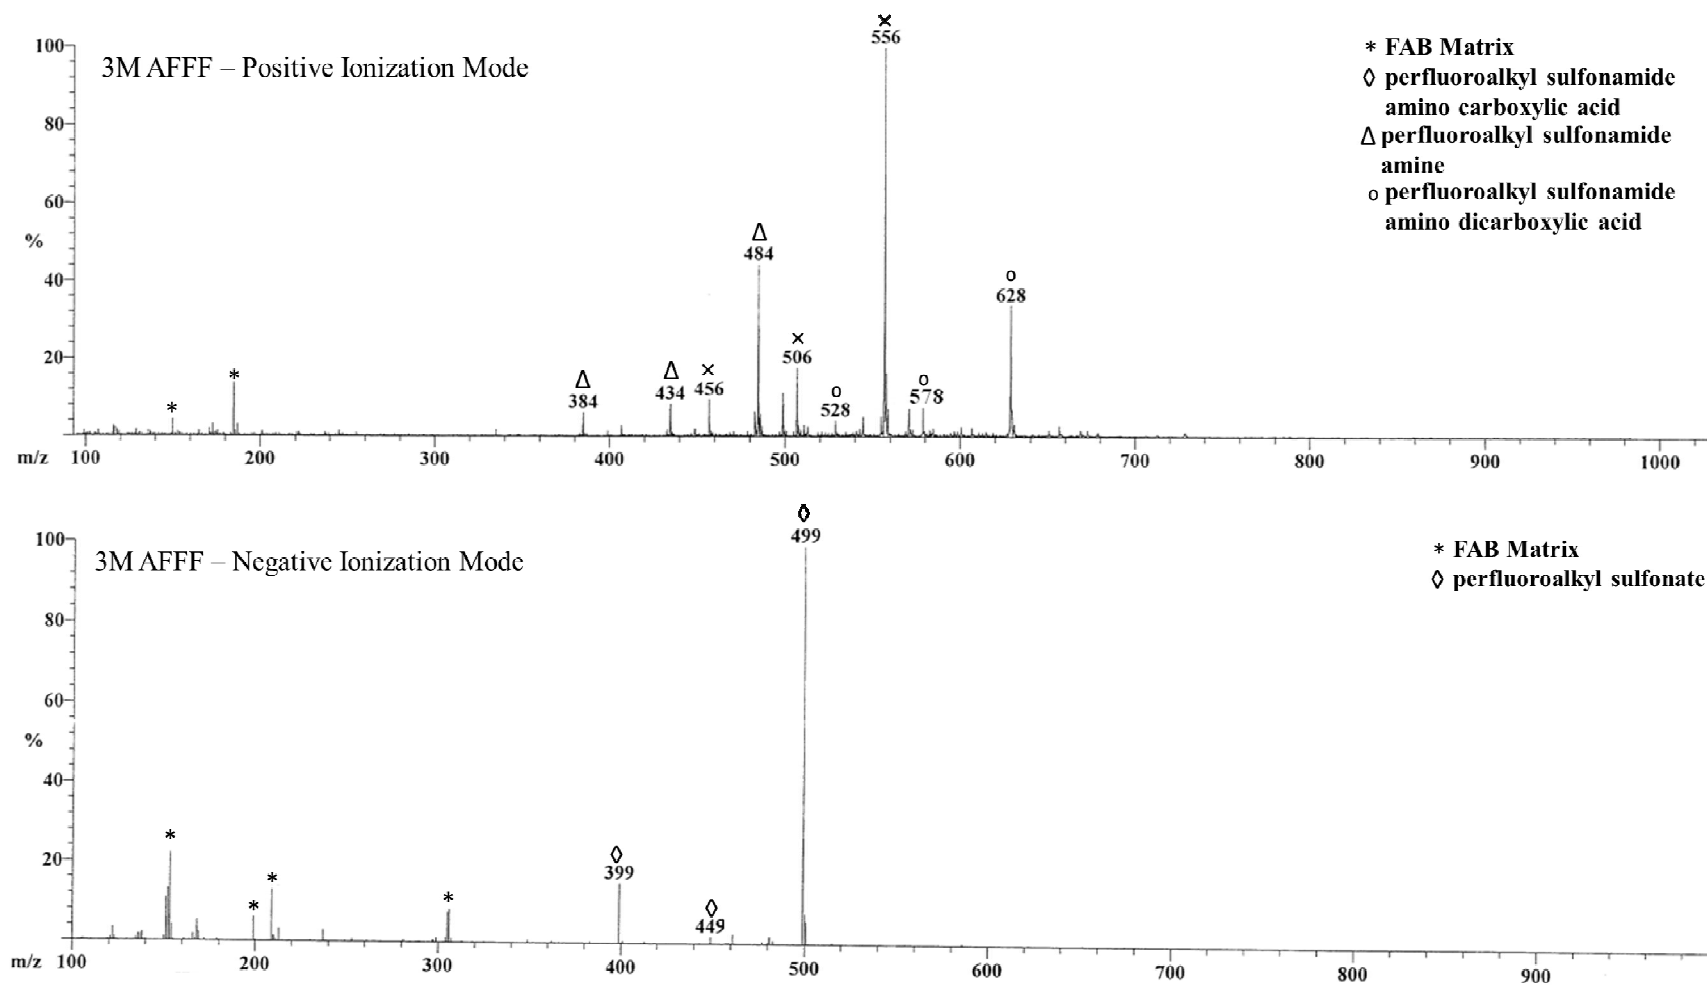

**Figure S2.** Example FAB-MS mass spectra of a Buckeye product.

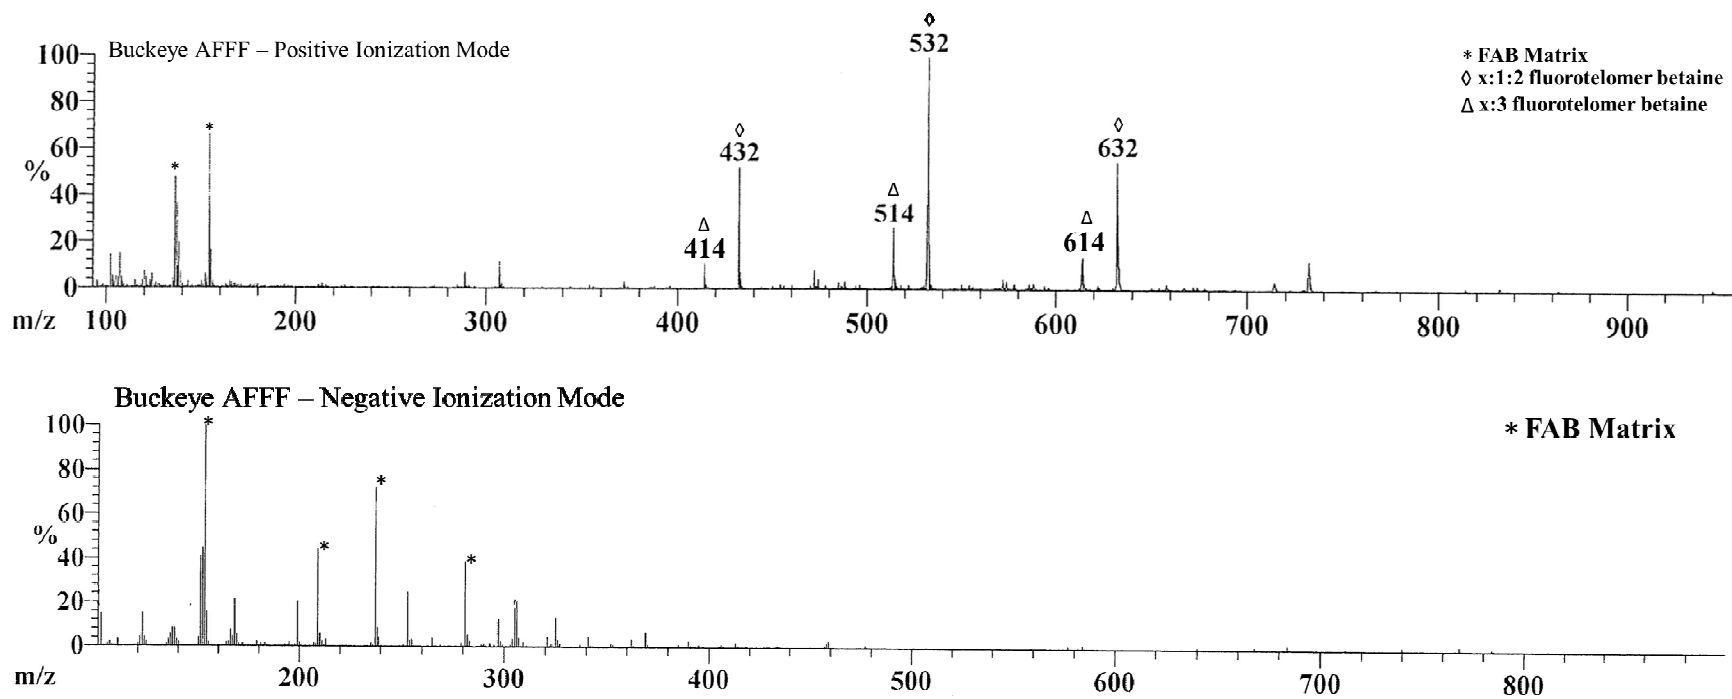

**Figure S3.** Example QTOF-MS high resolution chromatogram and mass spectrum of a 3M AFFF product, specifically isolating peak  $m/z$  499. This high resolution mass ( $m/z$  498.9297) was determined to be perfluorooctane sulfonic acid.

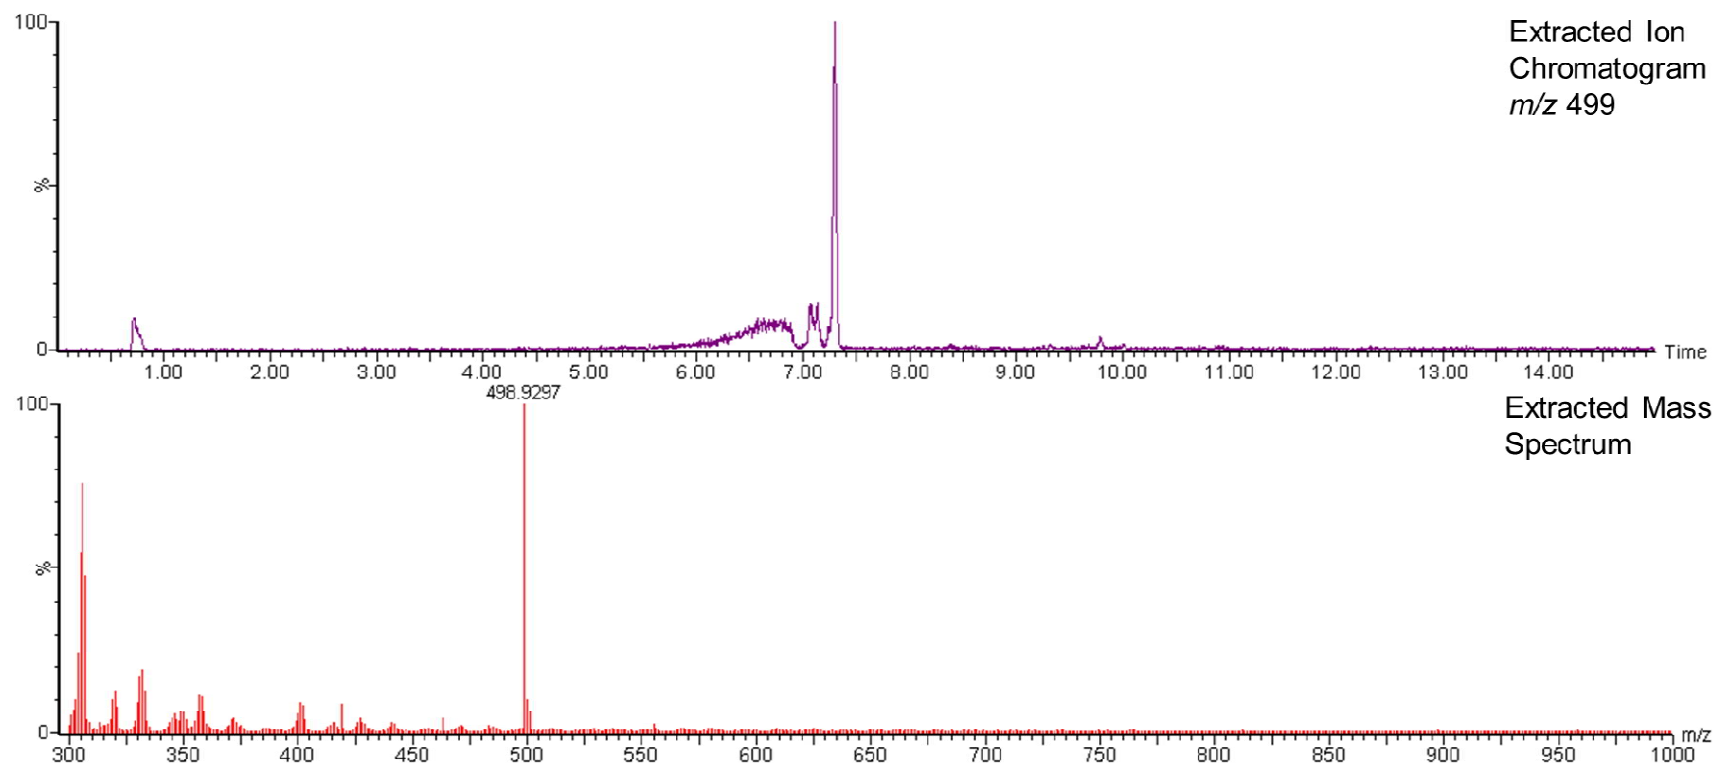

**Figure S4.** Example QTOF-MS high resolution chromatogram and mass spectrum of a Buckeye AFFF product, specifically isolating peak  $m/z$  532. This high resolution mass ( $m/z$  532.0759) was determined to be 7:1:2 fluorotelomer betaine.

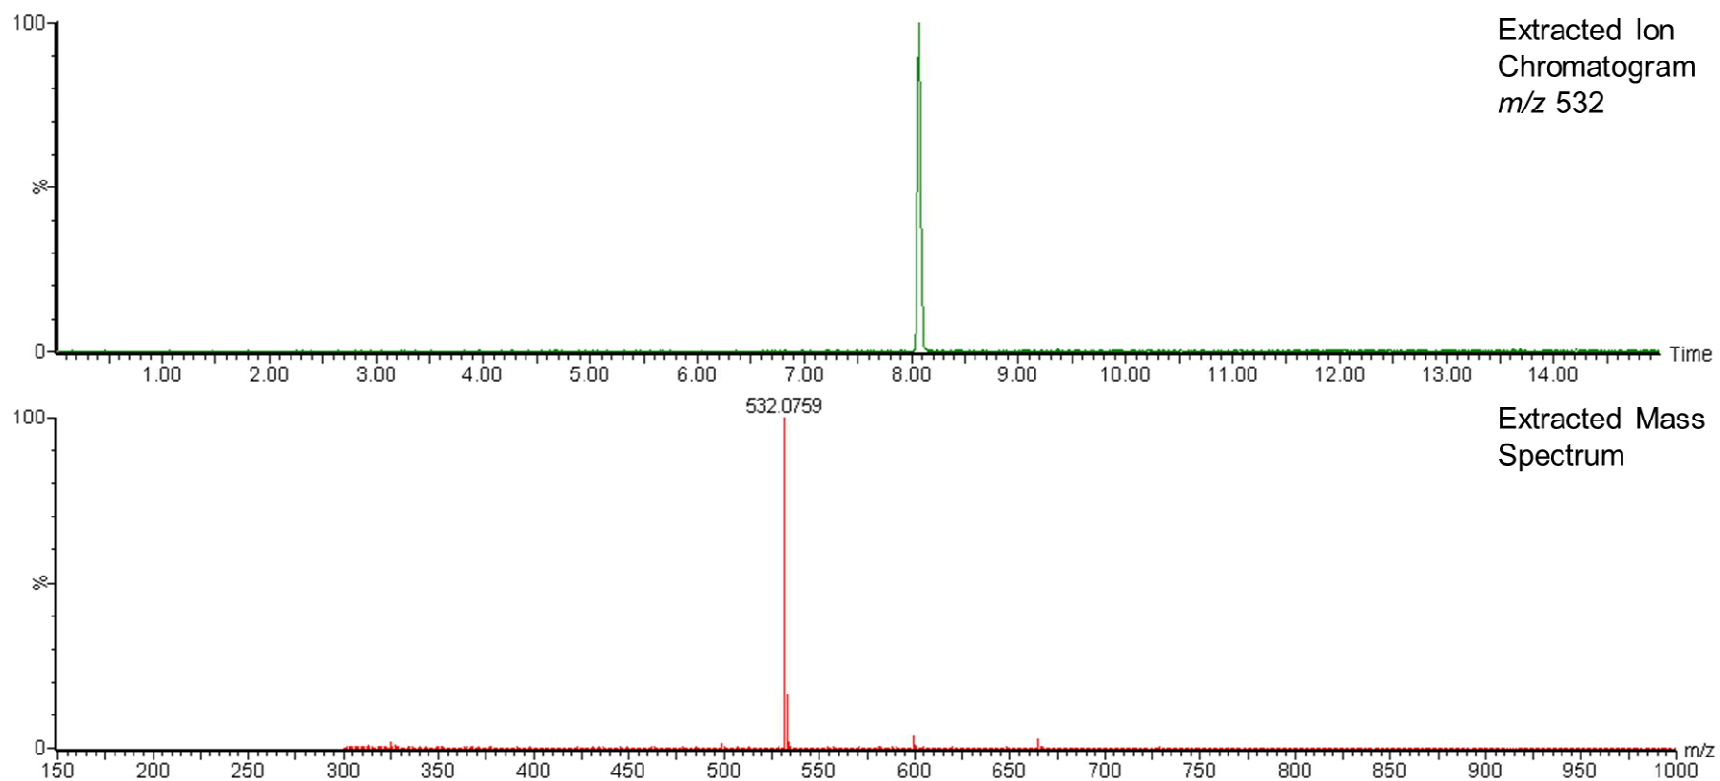

**Table S1.** High mass accuracy measurements for all identified AFFF fluorochemicals. ‡ High mass accuracy identification codes, Identification code ranking: 1 = Formula identified from accurate mass and isotopic match, 2 = Formula identified only from accurate mass, 3 = Formula alternatively identified (e.g. FAB-MS fluorochemical mass spacing from identified fluorochemical)

| AFFF Product | Nominal Mass  | Accurate Mass | Measured Mass | Error (ppm) | Isotopic Fit Conf % | Ion State          | Ion Formula        | ID Code‡        |   |
|--------------|---------------|---------------|---------------|-------------|---------------------|--------------------|--------------------|-----------------|---|
| 3M           | 385           | 385.0632      | 385.0632      | 0           | 96.88               | [M+H] <sup>+</sup> | C9H14N2O2S1F9      | 1               |   |
|              | 399           | 398.9361      | 398.9378      | 4.3         | 65.69               | [M-H] <sup>-</sup> | C6O3S1F13          | 1               |   |
|              | 435           | 435.0600      | 435.0586      | -3.2        | 99.12               | [M+H] <sup>+</sup> | C10H14N2O2S1F11    | 1               |   |
|              | 449           | 448.9329      | 448.9328      | -0.2        | 89.07               | [M-H] <sup>-</sup> | C7O3S1F15          | 1               |   |
|              | 457           | 457.0844      | 457.0829      | -3.3        | 94.3                | [M+H] <sup>+</sup> | C12H18N2O4S1F9     | 1               |   |
|              | 485           | 485.0568      | 485.0567      | -0.2        | 99.62               | [M+H] <sup>+</sup> | C11H14N2O2S1F13    | 1               |   |
|              | 499           | 498.9297      | 498.9303      | 1.2         | 97.34               | [M-H] <sup>-</sup> | C8O3S1F17          | 1               |   |
|              | 507           | 507.0812      | 507.0807      | -1          | 3.33                | [M+H] <sup>+</sup> | C13H18N2O4S1F11    | 2               |   |
|              | 557           | 557.0780      | 557.0768      | -2.2        | 94.27               | [M+H] <sup>+</sup> | C14H18N2O4S1F13    | 1               |   |
|              | 579           | 579.1023      | 579.1034      | 1.9         | 51.45               | [M+H] <sup>+</sup> | C16H22N2O6S1F11    | 1               |   |
|              | 629           | 629.0991      | 629.0967      | -3.8        | 61.06               | [M+H] <sup>+</sup> | C17H22N2O6S1F13    | 1               |   |
|              | National Foam | 513           | 513.0881      | 513.0890    | 1.8                 | 99.99              | [M+H] <sup>+</sup> | C13H18N2O2S1F13 | 1 |
|              |               | 571           | 571.0936      | 571.0930    | -1.1                | 99.81              | [M] <sup>+</sup>   | C15H20N2O4S1F13 | 1 |
|              |               | 613           | 613.0818      | 613.0818    | 0                   | 49.55              | [M+H] <sup>+</sup> | C15H18N2O2S1F17 | 1 |
| 671          |               | 671.0872      | 671.0861      | -1.6        | 96.62               | [M] <sup>+</sup>   | C17H20N2O4S1F17    | 1               |   |
| 771          |               | 771.0808      | 771.0818      | 1.3         | 91.47               | [M] <sup>+</sup>   | C19H20N2O4S1F21    | 1               |   |
| 871          |               | 871.0745      | 871.0771      | 3           | 15.18               | [M] <sup>+</sup>   | C21H20N2O4F25S     | 2               |   |
| Ansul        | 586           | 586.0391      | 586.0394      | 0.5         | 84.23               | [M-H] <sup>-</sup> | C15H17N1O4S2F13    | 1               |   |
|              | 602           | 602.0341      | 602.0332      | -1.5        | 6.63                | [M-H] <sup>-</sup> | C15H17N1O5S2F13    | 2               |   |
|              | 686           | 686.0328      | 686.0312      | -2.3        | 13.65               | [M-H] <sup>-</sup> | C17H17N1O4S2F17    | 2               |   |
| Angus        | 496           | 496.0980      | 496.0967      | -2.6        | 14.49               | [M] <sup>+</sup>   | C14H19N1O1S1F13    | 2               |   |
|              | 586           | 586.0391      | 586.0381      | -1          | 0.17                | [M-H] <sup>-</sup> | C15H17N1O4S2F13    | 2               |   |
|              | 596           | 596.0916      | nd            | nd          | nd                  | [M] <sup>+</sup>   | C16H19N1O1S1F17    | 3               |   |
| Chemguard    | 602           | 602.0341      | 602.0332      | -1.5        | 6.63                | [M-H] <sup>-</sup> | C15H17N1O5S2F13    | 2               |   |
|              | 586           | 586.0391      | 586.0375      | -2.7        | 9.64                | [M-H] <sup>-</sup> | C15H17N1O4S2F13    | 2               |   |
|              | 581           | 581.1144      | 581.1125      | -3.3        | 98.2                | [M+H] <sup>+</sup> | C17H22N2O3S1F13    | 1               |   |
|              | 681           | 681.1080      | 681.1093      | 1.9         | 40.34               | [M+H] <sup>+</sup> | C19H22N2O3S1F17    | 1               |   |
| Buckeye      | 781           | 781.1016      | 781.1032      | 2.0         | 3.99                | [M+H] <sup>+</sup> | C21H22N2O3S1F21    | 2               |   |
|              | 414           | 414.0927      | 414.0909      | -4.3        | 0.66                | [M] <sup>+</sup>   | C12H15N1O2F11      | 2               |   |
|              | 432           | 432.0833      | 432.0844      | 2.5         | 29.64               | [M] <sup>+</sup>   | C12H14N1O2F12      | 2               |   |
|              | 514           | 514.0863      | 514.0852      | -2.1        | 7.41                | [M] <sup>+</sup>   | C14H15N1O2F15      | 2               |   |
|              | 532           | 532.0769      | 532.0756      | -2.4        | 3.77                | [M] <sup>+</sup>   | C14H14N1O2F16      | 2               |   |
|              | 614           | 614.0799      | 614.0792      | -1.1        | 0.42                | [M] <sup>+</sup>   | C16H15N1O2F19      | 2               |   |
| Fireade      | 632           | 632.0705      | 632.6900      | -2.4        | 19.75               | [M] <sup>+</sup>   | C16H14N1O2F20      | 2               |   |
|              | 513           | 513.0881      | 513.0866      | -2.9        | 9.36                | [M+H] <sup>+</sup> | C13H18N2O2S1F13    | 2               |   |
|              | 571           | 571.0936      | 571.0931      | -0.9        | 98.54               | [M] <sup>+</sup>   | C15H20N2O4S1F13    | 1               |   |
|              | 613           | 613.0818      | 613.0799      | -3.1        | 0.01                | [M+H] <sup>+</sup> | C15H18N2O2S1F17    | 2               |   |
|              | 671           | 671.0872      | 671.0879      | 1           | 99.75               | [M] <sup>+</sup>   | C17H20N2O4S1F17    | 1               |   |
|              | 771           | 771.0808      | 771.0811      | 0.4         | 44.04               | [M] <sup>+</sup>   | C19H20N2O4S1F21    | 1               |   |
|              | 871           | 871.0745      | 871.0724      | -2.5        | 77.66               | [M] <sup>+</sup>   | C21H20N2O4F25S     | 1               |   |

**Table S2.** Structural identification of all identified AFFF fluorochemicals. \* x:y:z fluorotelomer indicates an alkyl chain with x carbons completely fluorinated, y carbons partially fluorinated, and z carbons non-fluorinated. †Refer to the generic structures in **Figure 3** and **4**; numbers in parentheses indicate completely fluorinated chain length. ‘Pat.’ refers to patent used for structural determination, the numbers correspond to the reference.

| AFFF Product | Nominal Mass  | Generic Name                                               | IUPAC Name                                                                                        | Generic Structure †                                                                          | Pat.    |   |
|--------------|---------------|------------------------------------------------------------|---------------------------------------------------------------------------------------------------|----------------------------------------------------------------------------------------------|---------|---|
| 3M           | 385           | perfluorobutane sulfonamide amine                          | N-(3-(dimethylamino)propyl)-perfluorobutane-1-sulfonamide                                         | 3D (4)                                                                                       | 1       |   |
|              | 399           | perfluorohexane sulfonic acid                              | 1-perfluorohexane sulfonic acid                                                                   | 3A (6)                                                                                       | 1, 2    |   |
|              | 435           | perfluoropentane sulfonamide amine                         | N-(3-(dimethylamino)propyl)-perfluoropentane-1-sulfonamide                                        | 3D(5)                                                                                        | 1       |   |
|              | 449           | perfluoroheptane sulfonic acid                             | 1-perfluoroheptane sulfonic acid                                                                  | 3A (7)                                                                                       | 1, 2    |   |
|              | 457           | perfluorobutane sulfonamide amino carboxylic acid          | 3-(N-(3-(dimethylamino)propyl)-perfluorobutylsulfonamido)propanoic acid                           | 3B (4)                                                                                       | 1       |   |
|              | 485           | perfluorohexane sulfonamide amine                          | N-(3-(dimethylamino)propyl)-perfluorohexane-1-sulfonamide                                         | 3D(6)                                                                                        | 1       |   |
|              | 499           | perfluorooctane sulfonic acid                              | 1-perfluorooctane sulfonic acid                                                                   | 3A (8)                                                                                       | 1, 2    |   |
|              | 507           | perfluoropentane sulfonamide amino carboxylic acid         | 3-(N-(3-(dimethylamino)propyl)-perfluoropentylsulfonamido)propanoic acid                          | 3B (5)                                                                                       | 1       |   |
|              | 557           | perfluorohexane sulfonamide amino carboxylic acid          | 3-(N-(3-(dimethylamino)propyl)-perfluorohexylsulfonamido)propanoic acid                           | 3B (6)                                                                                       | 1       |   |
|              | 579           | perfluoropentane sulfonamide ammonio dicarboxylic acid     | N-(2-carboxyethyl)-3-(N-(2-carboxyethyl)-perfluoropentylsulfonamido)-N,N-dimethylpropan-1-aminium | 3C (5)                                                                                       | 1       |   |
|              | 629           | perfluorohexane sulfonamide ammonio dicarboxylic acid      | N-(2-carboxyethyl)-3-(N-(2-carboxyethyl)-perfluorohexylsulfonamido)-N,N-dimethylpropan-1-aminium  | 3C(6)                                                                                        | 1       |   |
|              | National Foam | 513                                                        | 6:2 fluorotelomer sulfonamide amine                                                               | N-[3-(dimethylamino) propyl]-1H,1H,2H,2H-perfluoro-1-octanesulfonamide                       | 4B (6)  | 3 |
|              |               | 571                                                        | 4:2 fluorotelomer sulfonamide betaine                                                             | N-(carboxymethyl)-N,N-dimethyl-3-(1H,1H,2H,2H-perfluoro-1-hexanesulfonamido)propan-1-aminium | 4A (4)  | 3 |
| 613          |               | 8:2 fluorotelomer sulfonamide amine                        | N-[3-(dimethylamino) propyl]-1H,1H,2H,2H-perfluoro-1-decanesulfonamide                            | 4B (8)                                                                                       | 3       |   |
| 671          |               | 6:2 fluorotelomer sulfonamide betaine                      | N-(carboxymethyl)-N,N-dimethyl-3-(1H,1H,2H,2H-perfluoro-1-octanesulfonamido)propan-1-aminium      | 4A (6)                                                                                       | 3       |   |
| 771          |               | 8:2 fluorotelomer sulfonamide betaine                      | N-(carboxymethyl)-N,N-dimethyl-3-(1H,1H,2H,2H-perfluoro-1-decanesulfonamido)propan-1-aminium      | 4A (8)                                                                                       | 3       |   |
| 871          |               | 10:2 fluorotelomer sulfonamide betaine                     | N-(carboxymethyl)-N,N-dimethyl-3-(1H,1H,2H,2H-perfluoro-1-dodecanesulfonamido)propan-1-aminium    | 4A (10)                                                                                      | 3       |   |
| Ansul        | 586           | 6:2 fluorotelomer thioether amido sulfonic acid            | 2-methyl-2-(3-((1H,1H,2H,2H-perfluoro-1-octyl)thio)propanamido)propane-1-sulfonate                | 4C (6)                                                                                       | 4, 5, 6 |   |
|              | 602           | 6:2 fluorotelomer thioether amido sulfonic acid (+ oxygen) | n/a                                                                                               | n/a                                                                                          |         |   |
|              | 686           | 8:2 fluorotelomer thioether amido sulfonic acid            | 2-methyl-2-(3-((1H,1H,2H,2H-perfluoro-1-decyl)thio)propanamido)propane-1-sulfonate                | 4C (8)                                                                                       | 4, 5, 6 |   |
| Angus        | 496           | 6:2 fluorotelomer thio hydroxy ammonium                    | 2-hydroxy-N,N,N-trimethyl-3-((1H,1H,2H,2H-perfluoro-1-octyl)thio)propan-1-aminium                 | 4D (6)                                                                                       | 4       |   |
|              | 586           | 6:2 fluorotelomer thioether amido sulfonic acid            | 2-methyl-2-(3-((1H,1H,2H,2H-perfluoro-1-octyl)thio)propanamido)propane-1-sulfonate                | 4C (6)                                                                                       | 4, 5, 6 |   |
|              | 596           | 8:2 fluorotelomer thio hydroxy ammonium                    | 2-hydroxy-N,N,N-trimethyl-3-((1H,1H,2H,2H-perfluoro-1-decyl)thio)propan-1-aminium                 | 4D (8)                                                                                       | 4       |   |
|              | 602           | 6:2 fluorotelomer thioether amido sulfonic acid (+ oxygen) | n/a                                                                                               | n/a                                                                                          |         |   |
| Chemguard    | 586           | 6:2 fluorotelomer thioether amido sulfonic acid            | 2-methyl-2-(3-((1H,1H,2H,2H-perfluoro-1-octyl)thio)propanamido)propane-1-sulfonate                | 4C (6)                                                                                       | 4, 5, 6 |   |
|              | 581           | 6:2 fluorotelomer thioether amido amino carboxylic acid    | 4-((3-(dimethylamino)propyl)amino)-4-oxo-2((1H,1H,2H,2H-perfluorooctyl)thio)butanoic acid         | 4E (6)                                                                                       | 7       |   |
|              | 681           | 8:2 fluorotelomer thioether amino carboxylic acid          | 4-((3-(dimethylamino)propyl)amino)-4-oxo-2((1H,1H,2H,2H-perfluorodecyl)thio)butanoic acid         | 4E (8)                                                                                       | 7       |   |
|              | 781           | 10:2 fluorotelomer thioether amino carboxylic acid         | 4-((3-(dimethylamino)propyl)amino)-4-oxo-2((1H,1H,2H,2H-perfluorododecyl)thio)butanoic acid       | 4E (10)                                                                                      | 7       |   |
| Buckeye      | 414           | 5:3 fluorotelomer betaine                                  | N-(carboxymethyl)-1H,1H,2H,2H,3H,3H -N,N-dimethylperfluorooctan-1-aminium                         | 4F (5)                                                                                       | 4       |   |
|              | 432           | 5:1:2 fluorotelomer betaine*                               | N-(carboxymethyl)-1H,1H,2H,2H,3H -N,N-dimethylperfluorooctan-1-aminium                            | 4E (5)                                                                                       | 4       |   |
|              | 514           | 7:3 fluorotelomer betaine                                  | N-(carboxymethyl)-1H,1H,2H,2H,3H,3H -N,N-dimethylperfluorodecan-1-aminium                         | 4F (7)                                                                                       | 4       |   |
|              | 532           | 7:1:2 fluorotelomer betaine*                               | N-(carboxymethyl)-1H,1H,2H,2H,3H -N,N-dimethylperfluorodecan-1-aminium                            | 4E (7)                                                                                       | 4       |   |
|              | 614           | 9:3 fluorotelomer betaine                                  | N-(carboxymethyl)-1H,1H,2H,2H,3H,3H -N,N-dimethylperfluorododecan-1-aminium                       | 4F (9)                                                                                       | 4       |   |
|              | 632           | 9:1:2 fluorotelomer betaine*                               | N-(carboxymethyl)-1H,1H,2H,2H,3H -N,N-dimethylperfluorododecan-1-aminium                          | 4G (9)                                                                                       | 4       |   |
| Fireade      | 513           | 6:2 fluorotelomer sulfonamide amine                        | N-[3-(dimethylamino) propyl]-1H,1H,2H,2H-perfluoro-1-octanesulfonamide                            | 4D (6)                                                                                       | 3       |   |
|              | 571           | 4:2 fluorotelomer sulfonamide betaine                      | N-(carboxymethyl)-N,N-dimethyl-3-(1H,1H,2H,2H-perfluoro-1-hexanesulfonamido)propan-1-aminium      | 4A(4)                                                                                        | 3       |   |
|              | 613           | 8:2 fluorotelomer sulfonamide amine                        | N-[3-(dimethylamino) propyl]-1H,1H,2H,2H-perfluoro-1-decanesulfonamide                            | 4B (8)                                                                                       | 3       |   |
|              | 671           | 6:2 fluorotelomer sulfonamide betaine                      | N-(carboxymethyl)-N,N-dimethyl-3-(1H,1H,2H,2H-perfluoro-1-octanesulfonamido)propan-1-aminium      | 4A (6)                                                                                       | 3       |   |
|              | 771           | 8:2 fluorotelomer sulfonamide betaine                      | N-(carboxymethyl)-N,N-dimethyl-3-(1H,1H,2H,2H-perfluoro-1-decanesulfonamido)propan-1-aminium      | 4A (8)                                                                                       | 3       |   |
|              | 871           | 10:2 fluorotelomer sulfonamide betaine                     | N-(carboxymethyl)-N,N-dimethyl-3-(1H,1H,2H,2H-perfluoro-1-dodecanesulfonamido)propan-1-aminium    | 4A (10)                                                                                      | 3       |   |



## References

1. Alm, R. R.; Stern, R. M. Aqueous film-forming foamable solution useful as fire extinguishing concentrate. U.S. Patent 5,085,786, Feb. 4, 1992.
2. Berger, T. W. Aqueous film-forming foam fire extinguisher. U.S. Patent 4,359,096, Nov. 16, 1982.
3. Norman, E. C.; Regina, A. C. Alcohol resistant aqueous film forming firefighting foam. U.S. Patent 5,207,932, May 4, 1993.
4. Clark, K. P.; Kleiner, E. K. Synergistic surfactant compositions and fire fighting concentrates thereof. U.S. Patent 5,616,273, Apr. 1, 1997.
5. Dear, R. E. A.; Kleiner, E. K. Fluorinated sulfonic acids and derivatives thereof. U.S. Patent 4,014,926, Mar. 29, 1977.
6. Falk, R. A. Aqueous wetting and film forming compositions. U.S. Patent 4,090,967, May 23, 1978.
7. Mueller, K.F. Perfluoroalkyl substituted anhydrides and polyacids, and derivatives thereof. U.S. Patent 4,153,590, May 8, 1979.
